# Supplementary material for: Oxygen evolution catalytic behaviour of Ni doped Mn3O4 in alkaline medium
Source: Royal Society of Chemistry journal article supplement (doi:10.1039/c6ra01877g), 2016-01-01
Supplement: c6ra01877g1.pdf [file c6ra01877g1.pdf]

Supplementary information's

## Oxygen evolution catalytic behaviour of Ni doped $\text{Mn}_3\text{O}_4$ in alkaline medium

V. Maruthapandian,\* T. Pandiarajan, V. Saraswathy\* and S. Muralidharan

CSIR-Central Electrochemical Research Institute, Karaikudi-630003, Tamilnadu, India.

Tel phone: +91-4565-241393, +91-4565-241359; Fax: +91-4565-227779

E-mail: maruthuori.tn@gmail.com and corrsars@gmail.com

### 1. X-ray diffraction patterns

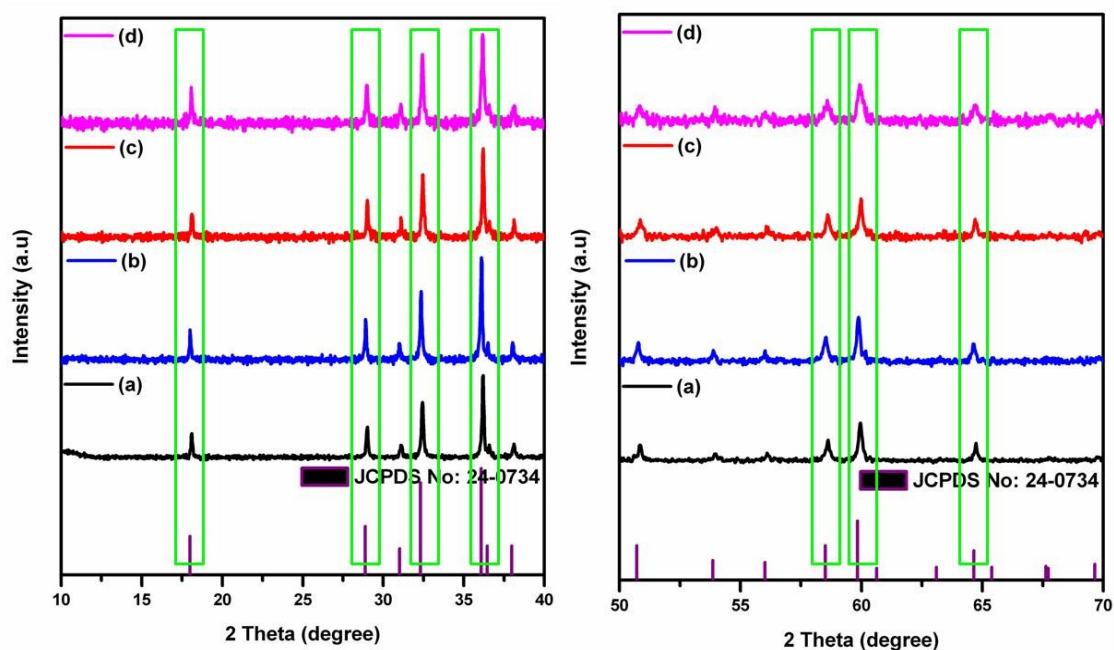

Fig. S1. X-ray diffraction patterns of  $\text{Mn}_3\text{O}_4$  and Ni doped  $\text{Mn}_3\text{O}_4$  in which (a) bare  $\text{Mn}_3\text{O}_4$ , (b) 1 wt% Ni doped  $\text{Mn}_3\text{O}_4$ , (c) 5 wt% Ni doped  $\text{Mn}_3\text{O}_4$  and (d) 10 wt% Ni doped  $\text{Mn}_3\text{O}_4$ .

Spinel ( $\text{AB}_2\text{O}_4$ ) based metal oxide are of great interest in the recent years in variety of technological applications due to the mixed valent metal cations of  $\text{A}^{2+}$  and  $\text{B}^{3+}$  offers more possible option to replace the metal cations to tune the desirable properties and applications vice versa. In  $\text{Mn}_3\text{O}_4$ , The Mn exists as  $\text{Mn}^{2+}$  in A site and  $\text{Mn}^{3+}$  in B site. Based on these principles recently, the catalytic, supercapactive and magnetic properties of  $\text{Mn}_3\text{O}_4$  are tuned by the doping of Ni, Co and Cr.<sup>1-3</sup> In this regard, the present study is the evaluation of catalytic behavior of  $\text{Mn}_3\text{O}_4$  by the doping of Ni in the form of  $\text{Ni}^{2+}$  ion in A lattice of  $\text{Mn}_3\text{O}_4$ . The doping is possible due to the closest ionic radii of  $\text{Mn}^{2+}$  (0.80 Å) and  $\text{Ni}^{2+}$  (0.69Å).

While doping of  $\text{Ni}^{2+}$  in the  $\text{Mn}_3\text{O}_4$ , the tetrahedral site  $\text{Mn}^{2+}$  ion are partially doped /replaced/substituted by the  $\text{Ni}^{2+}$  ions, in mean time the octahedral site contains the  $\text{Mn}^{3+}$  ions as

such without any substitution.<sup>2</sup> Fig. S1 shows the XRD patterns of the present study of bare  $Mn_3O_4$  and 1, 5 and 10 wt% Ni doped  $Mn_3O_4$  samples. In the XRD patterns no characteristics peak changes are observed (the peaks are highlighted in Fig S1). It is due to the previously mentioned same ionic radii of dopant of Ni and comparably very low level of Ni doping (Ni is doped 1, 5 and 10 wt% on the basis of total wt% in the  $Mn_3O_4$ ). This similar trend in XRD pattern is observed in the recent studies of Cr, Co, Ni and Cu doped  $Mn_3O_4$  and Cr doped  $NiFe_2O_4$ .<sup>1-4</sup>

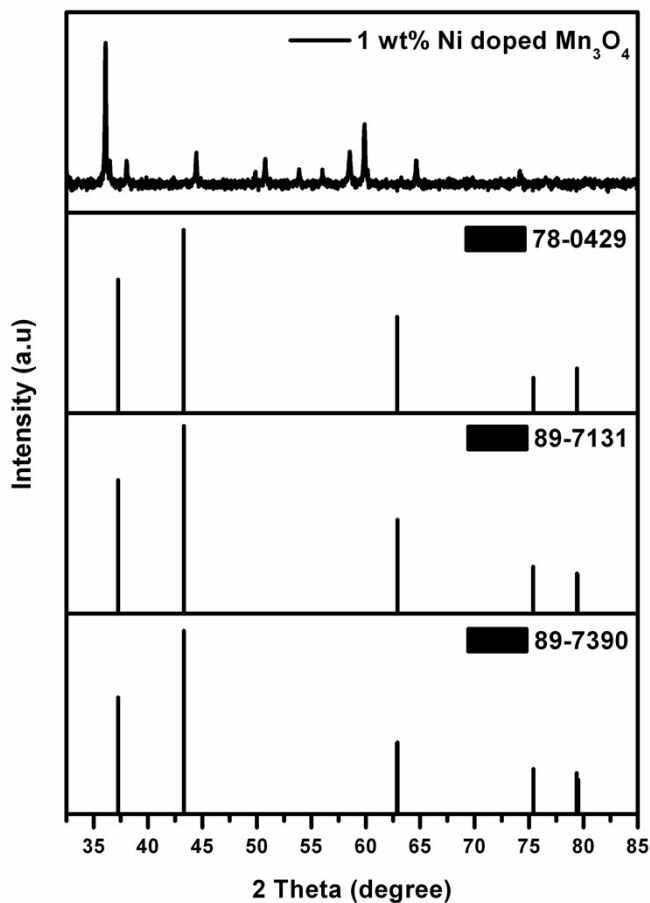

Fig. S2. X-ray diffraction pattern of 1 wt% Ni doped  $Mn_3O_4$  with standard diffraction patterns of  $NiO$

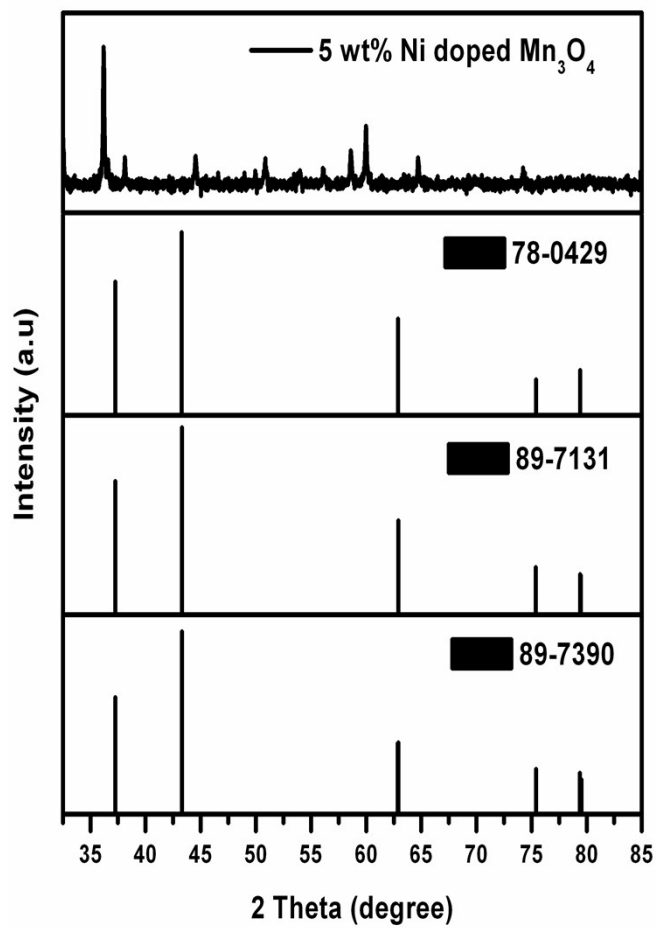

Fig. S3. X-ray diffraction of pattern of 5 wt% Ni doped  $\text{Mn}_3\text{O}_4$  with standard diffraction patterns of NiO

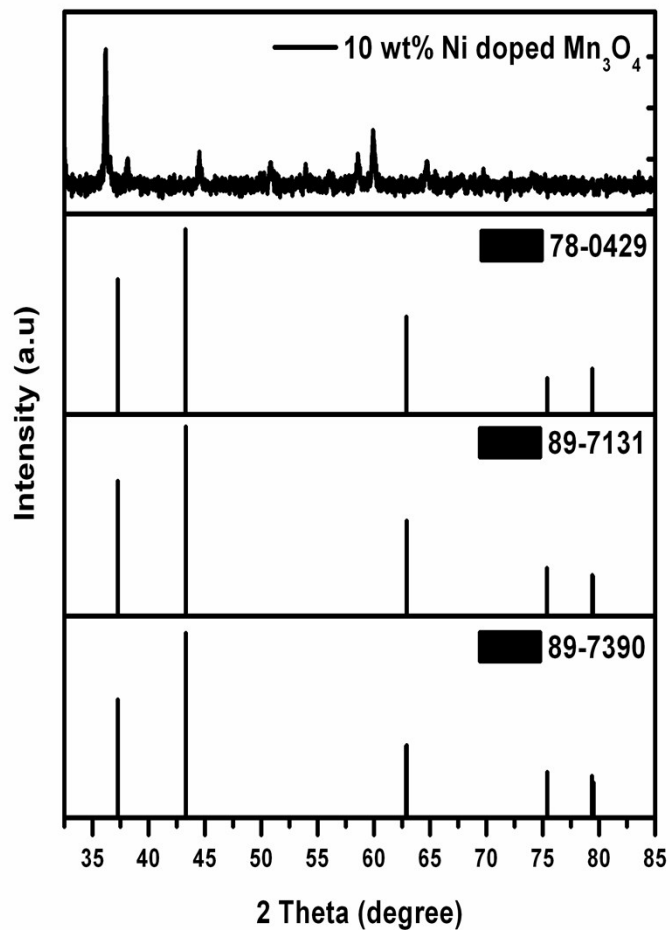

Fig. S4. X-ray diffraction of pattern of 10 wt% Ni doped  $Mn_3O_4$  with standard diffraction patterns of NiO

## 2. Selected area diffraction studies for lattice parameters

Table S1. Calculated lattice parameter of  $Mn_3O_4$  through the SAED

| 2R in pix | R in 1/nm | Calculated D space in Å | JCPDS No 24-0734 D space in Å | hkl |
|-----------|-----------|-------------------------|-------------------------------|-----|
| 161.47    | 2.0183    | 4.9544                  | 4.9240                        | 101 |
| 261.84    | 3.2730    | 3.0553                  | 3.0890                        | 112 |
| 322.67    | 4.0333    | 2.4793                  | 2.4870                        | 211 |
| 326.22    | 4.0777    | 2.4523                  | 2.4630                        | 202 |
| 344.45    | 4.3056    | 2.3225                  | 2.3670                        | 004 |
| 447.69    | 5.5961    | 1.7869                  | 1.7988                        | 105 |
| 511.69    | 6.3961    | 1.5634                  | 1.5762                        | 321 |
| 521.49    | 6.5186    | 1.5340                  | 1.5443                        | 224 |
| 613.65    | 7.6706    | 1.3036                  | 1.2777                        | 413 |

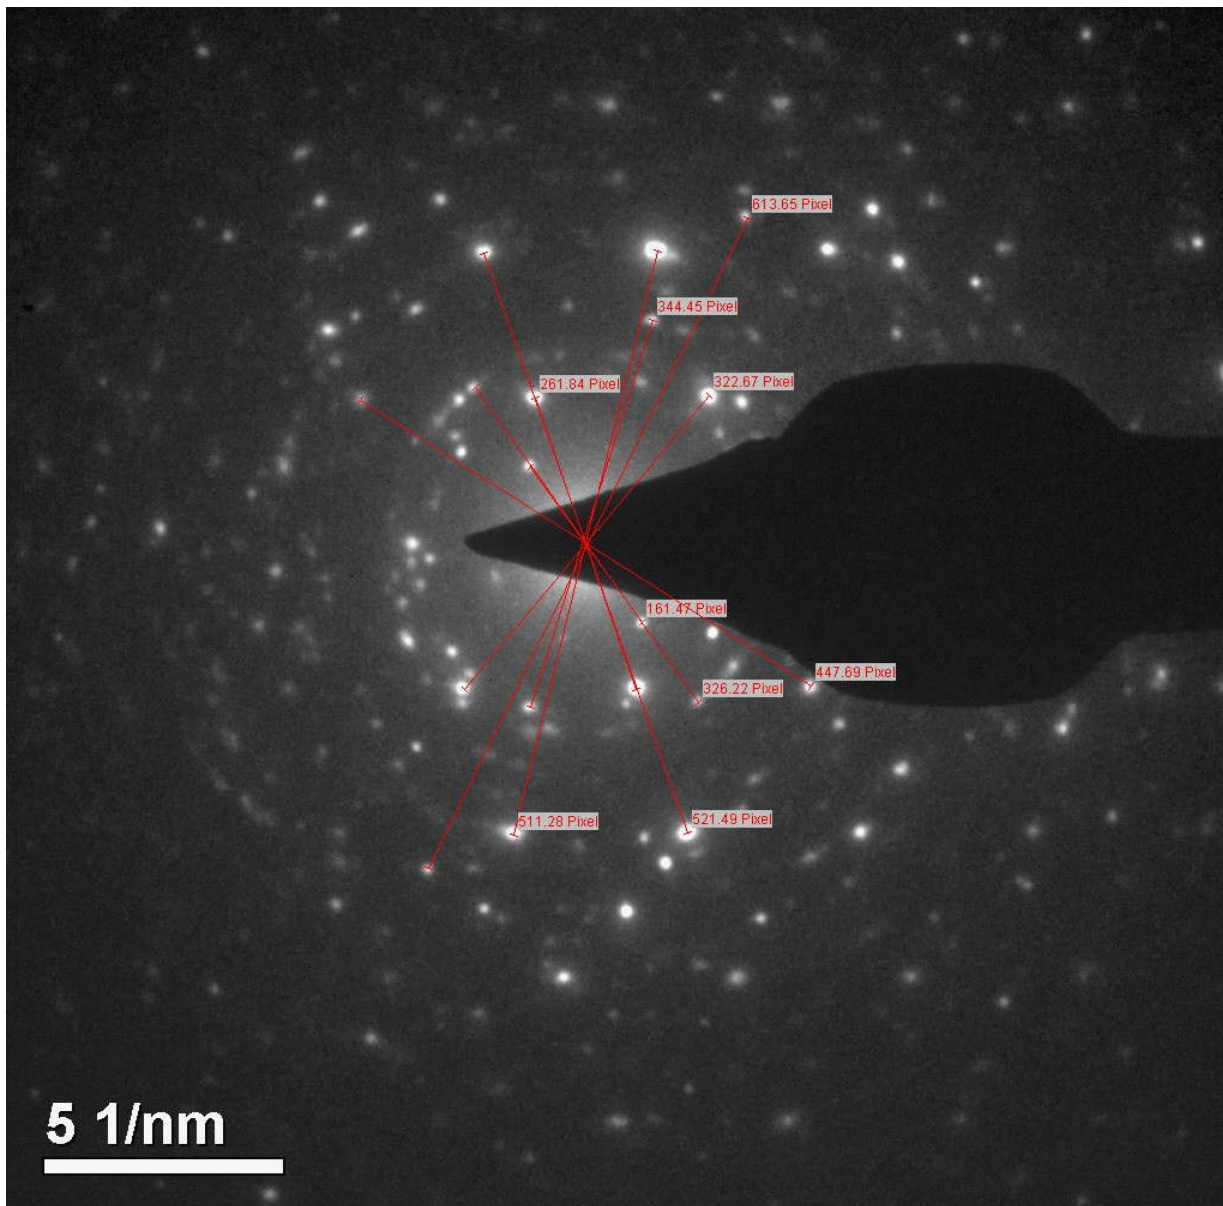

Fig. S5. Selected area diffraction pattern Mn<sub>3</sub>O<sub>4</sub> (5 nm = 200 pixel).

Table S2. Calculated lattice parameter of 10 wt% Ni doped Mn<sub>3</sub>O<sub>4</sub> through the SAED

| 2R in pix | R in 1/nm | D space in Å | JCPDS<br>No 24-<br>0734<br>D space in<br>Å | hkl |
|-----------|-----------|--------------|--------------------------------------------|-----|
| 409.42    | 4.0942    | 2.4424       | 2.4870                                     | 211 |
| 509.22    | 5.0922    | 1.9637       | 2.0369                                     | 220 |
| 589.07    | 5.8907    | 1.6975       | 1.7008                                     | 312 |

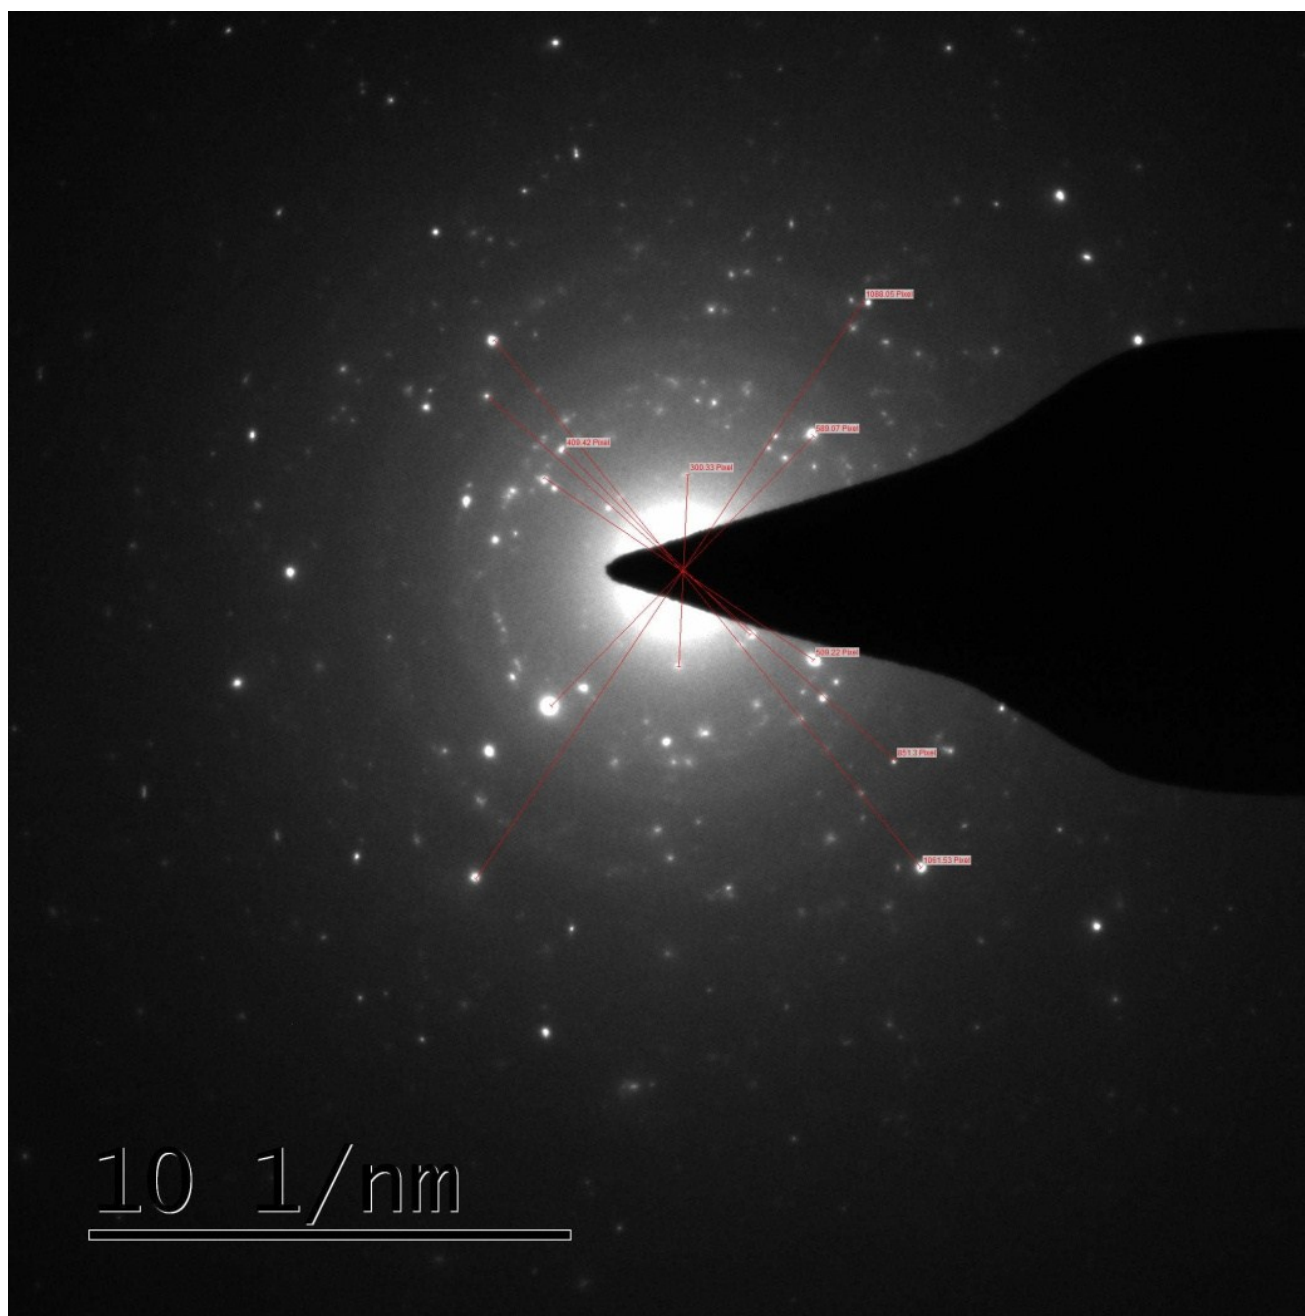

Fig. S6. Selected area diffraction pattern of 10 wt% Ni doped  $\text{Mn}_3\text{O}_4$  (10 nm = 500 pixel).

The measured diameter of SAED in pixel unit is not visible in the Fig. S6 as such condition. It is visible under magnification only.

3. Elemental mapping of Mn and Ni

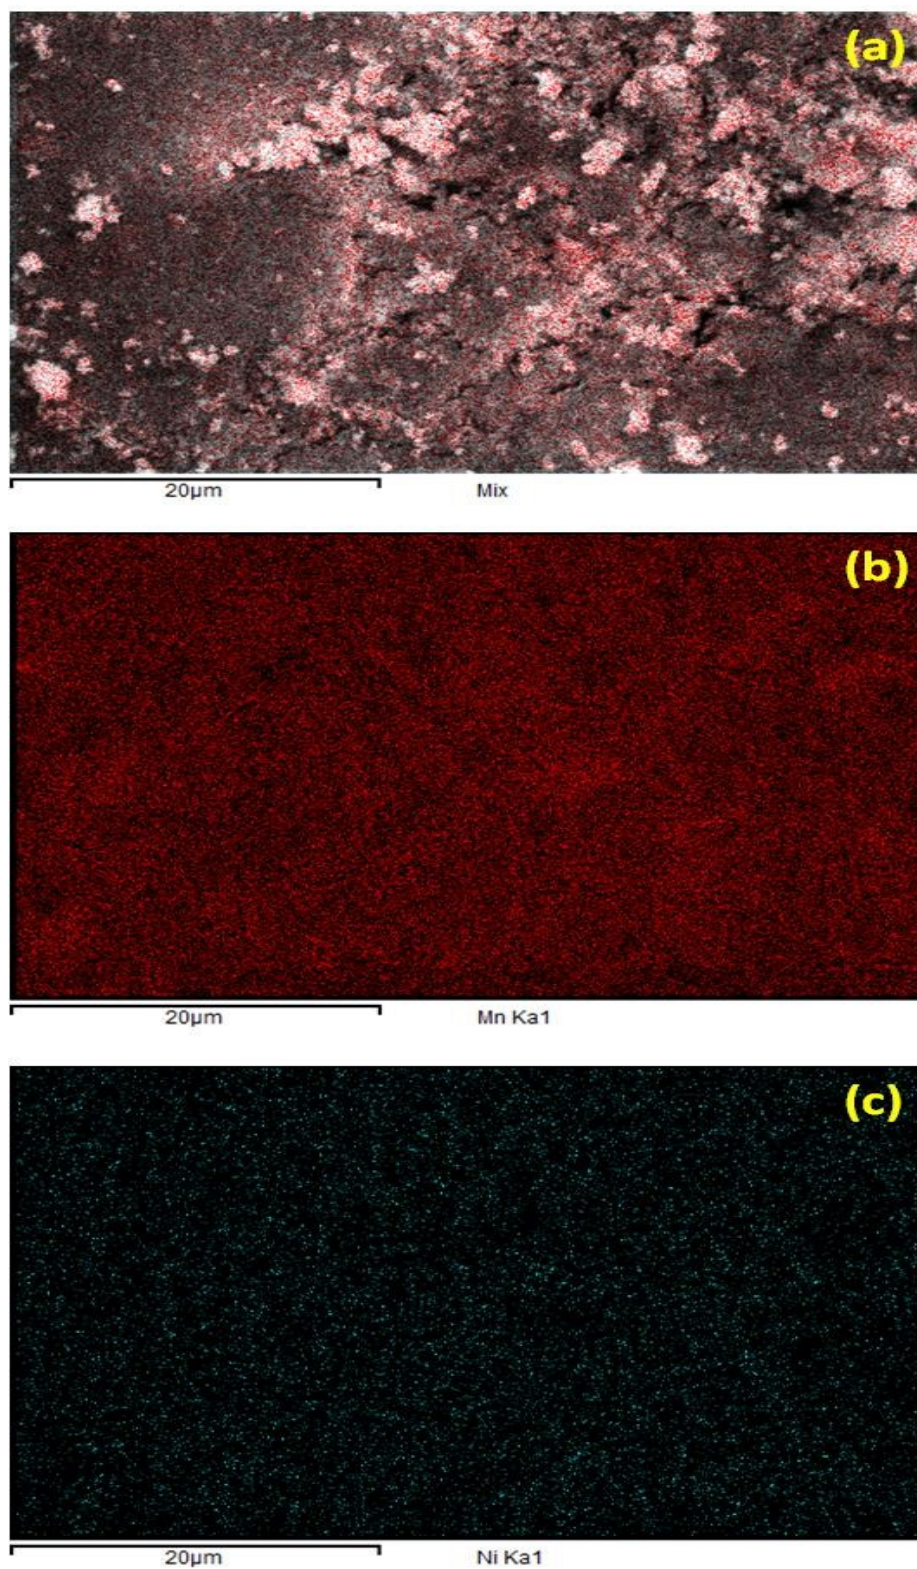

Fig. S7. Elemental mapping of Mn and Ni in 10 wt% Ni doped  $Mn_3O_4$ .



Table S3. Elemental composition of as prepared 10 wt% ni doped Mn<sub>3</sub>O<sub>4</sub> by EDS analysis.

| Element | Weight % | Atomic % | Compd % | Formula |
|---------|----------|----------|---------|---------|
| Mn K    | 69.23    | 44.93    | 89.39   | MnO     |
| Ni K    | 8.34     | 5.07     | 10.61   | NiO     |
| O       | 22.43    | 50.00    |         |         |
| Totals  | 100.00   |          |         |         |

#### 4. Atomic absorption spectrum studies

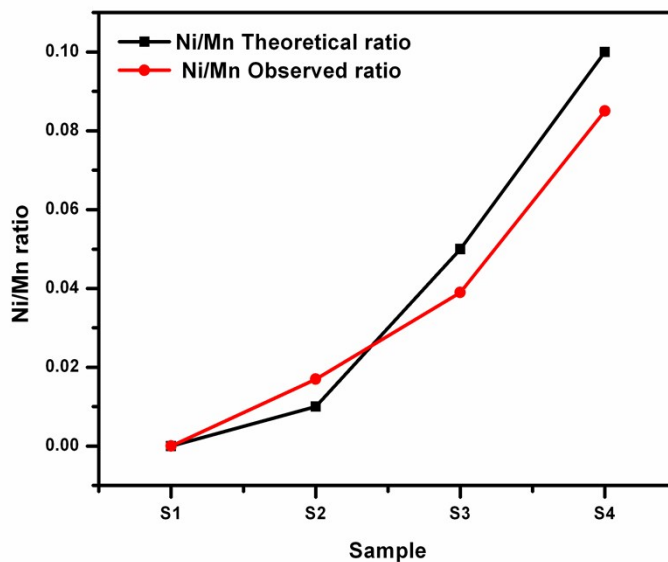

Fig. S8. Theoretical and observed Ni/Mn ratio of Mn<sub>3</sub>O<sub>4</sub> and Ni doped Mn<sub>3</sub>O<sub>4</sub>. Where S1) Mn<sub>3</sub>O<sub>4</sub>, S2) 1 wt% Ni doped Mn<sub>3</sub>O<sub>4</sub>, S3) 5 wt% Ni doped Mn<sub>3</sub>O<sub>4</sub> and S4) 10 wt Ni doped Mn<sub>3</sub>O<sub>4</sub>.

#### 5. FTIR spectrum studies

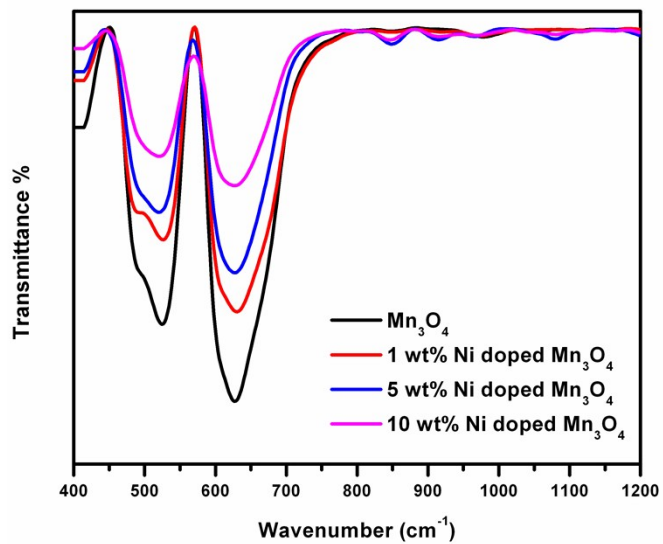

Fig. S9. FTIR spectrum of Mn<sub>3</sub>O<sub>4</sub> and Ni doped Mn<sub>3</sub>O<sub>4</sub>.

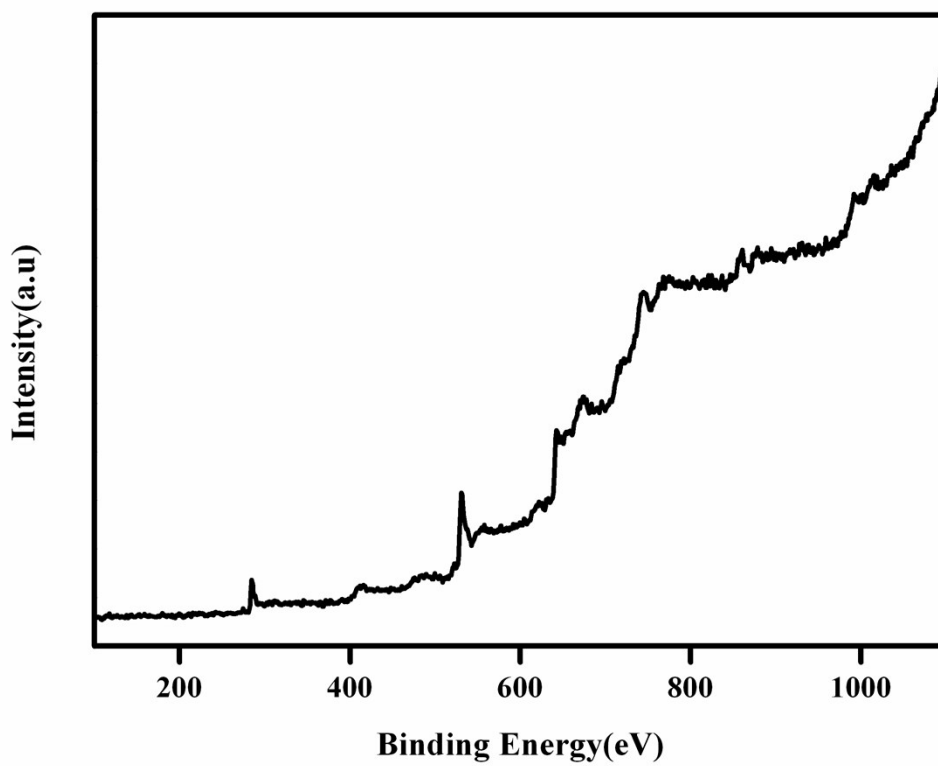

Fig. S10. Survey spectrum of 10 wt% Ni doped Mn<sub>3</sub>O<sub>4</sub>.

## 6. Micro-structural characterizations

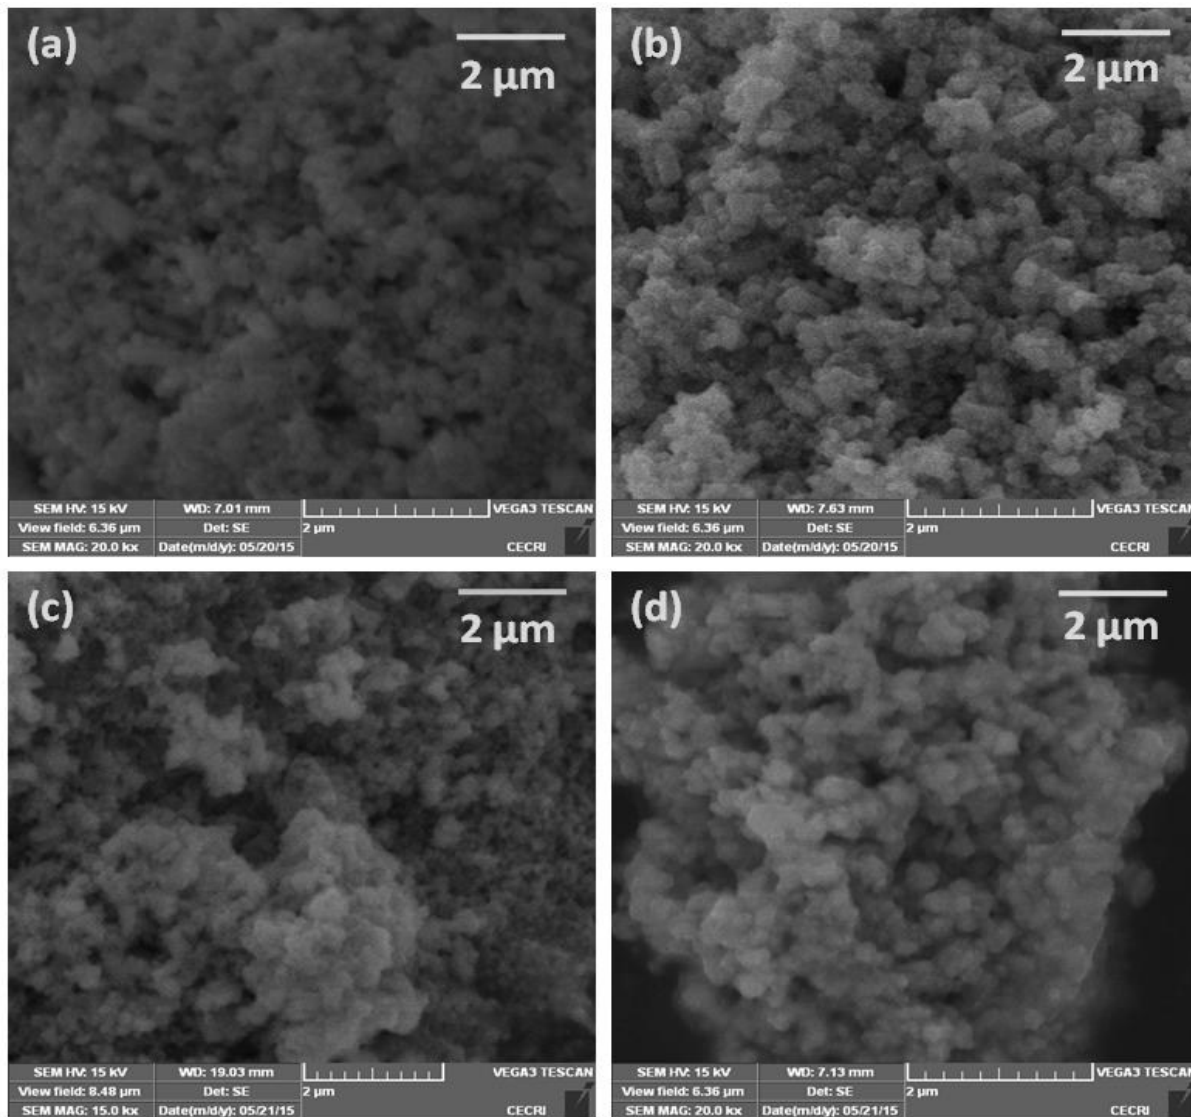

Fig. S11. SEM images of a) Mn<sub>3</sub>O<sub>4</sub>, b) 1 wt% Ni doped Mn<sub>3</sub>O<sub>4</sub>, c) 5 wt% Ni doped Mn<sub>3</sub>O<sub>4</sub> and d) 10 wt % Ni doped Mn<sub>3</sub>O<sub>4</sub>.

## 7. Cyclic stability of 10 wt% Ni doped Mn<sub>3</sub>O<sub>4</sub>

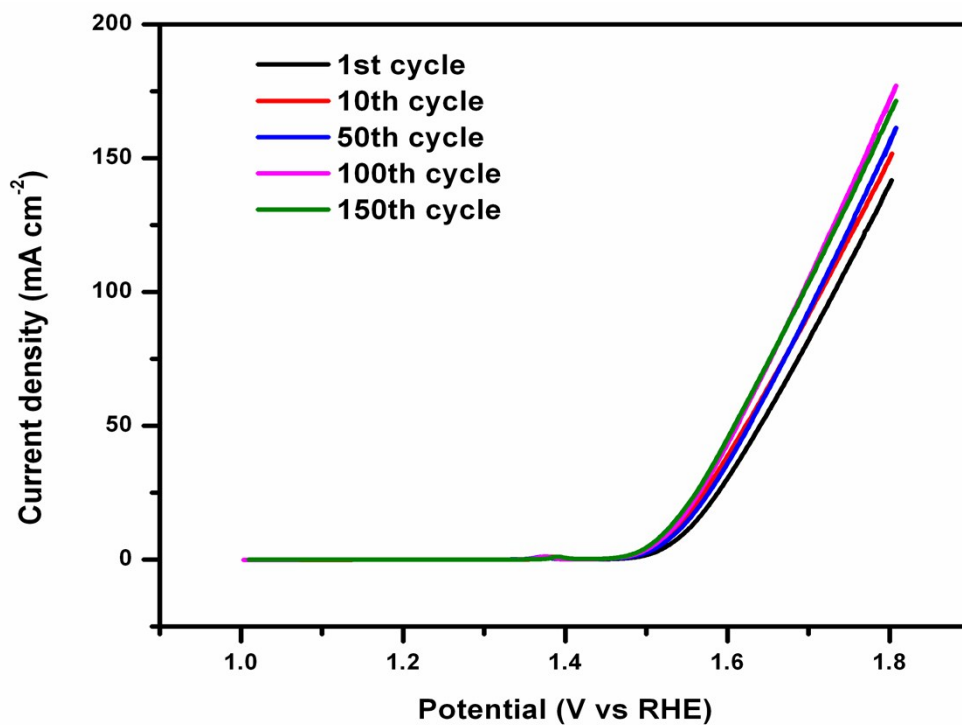

Fig. S12. Catalytic cyclic stability of 10 wt% Ni doped Mn<sub>3</sub>O<sub>4</sub> from the cyclic voltammetry data anodic part recorded at the scan rate of 2 mV s<sup>-1</sup> in 1 M KOH.

## References

1. G. Li, X. B. Tang, S. Y. Lou, and S. M. Zhou, *Appl. Phys. Lett.*, 2014, **104**, 173105.
2. S. Hirai, S. Yagi, A. Seno, M. Fujioka, T. Ohno and T. Matsuda, *RSC Adv.*, 2016, **6**, 2019.
3. R. Dong, Q. Ye, L. Kuang, X. Lu, Y. Zhang, X. Zhang, G. Tan, Y. Wen and F. Wang, *ACS Appl. Mater. Interfaces.*, 2013, **5**, 9508.
4. R.N. Singh, J.P. Singh, B. Lala, M.J.K. Thomasb, S. Bera, *Electrochimica Acta.*, 2006, **51** 5515.
